# Supplementary material for: Pch2 orchestrates the meiotic recombination checkpoint from the cytoplasm
Source: PubMed Central journal article supplement (PMC8312941; doi:10.1371/journal.pgen.1009560), 2021-07-14
Supplement: pgen.1009560.s009.pdf [file pgen.1009560.s009.pdf]

**S1 Table. *Saccharomyces cerevisiae* strains**

| Strain    | Genotype*                                                                                                                                                 | Source     |
|-----------|-----------------------------------------------------------------------------------------------------------------------------------------------------------|------------|
| BR1919-2N | <i>MATa/MAT<math>\alpha</math> leu2-3,112 his4-260 thr1-4 trp1-289 ura3-1 ade2-1</i>                                                                      | Roeder Lab |
| DP421     | BR1919-2N <i>lys2<math>\Delta</math>NheI</i>                                                                                                              | PSS Lab    |
| DP422     | DP421 <i>zip1<math>\Delta</math>::LYS2</i>                                                                                                                | PSS Lab    |
| DP424     | DP421 <i>ndt80<math>\Delta</math>::LEU2</i>                                                                                                               | PSS Lab    |
| DP428     | DP421 <i>zip1<math>\Delta</math>::LYS2 ndt80<math>\Delta</math>::LEU2</i>                                                                                 | PSS Lab    |
| DP881     | DP421 <i>zip1<math>\Delta</math>::LYS2 pch2<math>\Delta</math>::TRP1 ndt80<math>\Delta</math>::LEU2</i>                                                   | PSS Lab    |
| DP1023    | DP421 <i>pch2<math>\Delta</math>::TRP1</i>                                                                                                                | PSS Lab    |
| DP1029    | DP421 <i>zip1<math>\Delta</math>::LYS2 pch2<math>\Delta</math>::TRP1</i>                                                                                  | PSS Lab    |
| DP1058    | DP421 <i>pch2<math>\Delta</math>::TRP1 ndt80<math>\Delta</math>::LEU2</i>                                                                                 | PSS Lab    |
| DP1151    | BR1919-2N <i>3HA-PCH2</i>                                                                                                                                 | PSS Lab    |
| DP1152    | BR1919-2N <i>zip1<math>\Delta</math>::LEU2 3HA-PCH2</i>                                                                                                   | PSS Lab    |
| DP1161    | BR1919-2N <i>zip1<math>\Delta</math>::LEU2 pch2<math>\Delta</math>::TRP1</i>                                                                              | PSS Lab    |
| DP1164    | BR1919-2N <i>pch2<math>\Delta</math>::TRP1</i>                                                                                                            | PSS Lab    |
| DP1405    | DP421 <i>zip1<math>\Delta</math>::LEU2 pch2<math>\Delta</math>::URA3</i>                                                                                  | PSS Lab    |
| DP1500    | DP421 <i>zip1<math>\Delta</math>::LYS2 HOP1-mCherry::natMX4/HOP1</i>                                                                                      | PSS Lab    |
| DP1523    | DP421 <i>spo11<math>\Delta</math>::ADE2</i>                                                                                                               | PSS Lab    |
| DP1620    | BR1919-2N <i>P<sub>HOP1</sub>-GFP-PCH2</i>                                                                                                                | This work  |
| DP1621    | BR1919-2N <i>zip1<math>\Delta</math>::LEU2 P<sub>HOP1</sub>-GFP-PCH2</i>                                                                                  | This work  |
| DP1624    | BR1919-2N <i>P<sub>HOP1</sub>-GFP-PCH2/pch2<math>\Delta</math>::TRP1</i>                                                                                  | This work  |
| DP1625    | BR1919-2N <i>zip1<math>\Delta</math>::LEU2 P<sub>HOP1</sub>-GFP-PCH2/pch2<math>\Delta</math>::TRP1</i>                                                    | This work  |
| DP1630    | BR1919-2N <i>zip1<math>\Delta</math>::LEU2 P<sub>HOP1</sub>-GFP-PCH2 orc1-3mAID::hphNT P<sub>HOP1</sub>-OsTIR1::URA3 ndt80<math>\Delta</math>::kanMX3</i> | This work  |
| DP1633    | BR1919-2N <i>zip1<math>\Delta</math>::LEU2 P<sub>HOP1</sub>-GFP-PCH2 orc1-3mAID::hphNT P<sub>HOP1</sub>-OsTIR1::URA3 HOP1-mCherry::natMX4/HOP1</i>        | This work  |
| DP1636    | BR1919-2N <i>zip1<math>\Delta</math>::LEU2 P<sub>HOP1</sub>-GFP-PCH2 HOP1-mCherry::natMX4/HOP1</i>                                                        | This work  |
| DP1640    | BR1919-2N <i>zip1<math>\Delta</math>::LEU2 P<sub>HOP1</sub>-GFP-PCH2 ndt80<math>\Delta</math>::kanMX3 lys2/LYS2</i>                                       | This work  |
| DP1644    | BR1919-2N <i>zip1<math>\Delta</math>::LEU2 P<sub>HOP1</sub>-GFP-PCH2/pch2<math>\Delta</math>::TRP1 orc1-3mAID::hphNT P<sub>HOP1</sub>-OsTIR1::URA3</i>    | This work  |
| DP1650    | BR1919-2N <i>P<sub>HOP1</sub>-GFP-PCH2/pch2<math>\Delta</math>::TRP1 HOP1-mCherry::natMX4/HOP1</i>                                                        | This work  |

|        |                                                                                                                                  |           |
|--------|----------------------------------------------------------------------------------------------------------------------------------|-----------|
| DP1651 | BR1919-2N <i>zip1Δ::LEU2 P<sub>HOP1</sub>-GFP-PCH2/pch2Δ::TRP1 HOP1-mCherry::natMX4/HOP1</i>                                     | This work |
| DP1654 | BR1919-2N <i>P<sub>HOP1</sub>-GFP-PCH2/pch2Δ::TRP1 ndt80Δ::kanMX3</i>                                                            | This work |
| DP1655 | BR1919-2N <i>zip1Δ::LEU2 P<sub>HOP1</sub>-GFP-PCH2/pch2Δ::TRP1 ndt80Δ::kanMX3 lys2/LYS2</i>                                      | This work |
| DP1669 | DP421 <i>P<sub>HOP1</sub>-GFP-NES-PCH2</i>                                                                                       | This work |
| DP1670 | DP421 <i>zip1Δ::LYS2 P<sub>HOP1</sub>-GFP-NES-PCH2</i>                                                                           | This work |
| DP1685 | DP421 <i>P<sub>HOP1</sub>-GFP-NES-PCH2/pch2Δ::TRP1</i>                                                                           | This work |
| DP1686 | DP421 <i>zip1Δ::LYS2 P<sub>HOP1</sub>-GFP-NES-PCH2/pch2Δ::TRP1</i>                                                               | This work |
| DP1687 | DP421 <i>P<sub>HOP1</sub>-GFP-NES-PCH2/pch2Δ::TRP1 HOP1-mCherry::natMX4/HOP1</i>                                                 | This work |
| DP1688 | DP421 <i>zip1Δ::LYS2 P<sub>HOP1</sub>-GFP-NES-PCH2/pch2Δ::TRP1 HOP1-mCherry::natMX4/HOP1</i>                                     | This work |
| DP1695 | DP421 <i>P<sub>HOP1</sub>-GFP-NLS-PCH2</i>                                                                                       | This work |
| DP1696 | DP421 <i>zip1Δ::LYS2 P<sub>HOP1</sub>-GFP-NLS-PCH2</i>                                                                           | This work |
| DP1697 | DP421 <i>P<sub>HOP1</sub>-GFP-NLS-PCH2 HOP1-mCherry::natMX4/HOP1</i>                                                             | This work |
| DP1698 | DP421 <i>zip1Δ::LYS2 P<sub>HOP1</sub>-GFP-NLS-PCH2 HOP1-mCherry::natMX4/HOP1</i>                                                 | This work |
| DP1699 | DP421 <i>P<sub>HOP1</sub>-GFP-NLS-PCH2/pch2Δ::TRP1</i>                                                                           | This work |
| DP1700 | DP421 <i>P<sub>HOP1</sub>-GFP-NLS-PCH2/pch2Δ::TRP1 HOP1-mCherry::natMX4/HOP1</i>                                                 | This work |
| DP1701 | DP421 <i>zip1Δ::LYS2 P<sub>HOP1</sub>-GFP-NLS-PCH2/pch2Δ::TRP1</i>                                                               | This work |
| DP1702 | DP421 <i>zip1Δ::LYS2 P<sub>HOP1</sub>-GFP-NLS-PCH2/pch2Δ::TRP1 HOP1-mCherry::natMX4/HOP1</i>                                     | This work |
| DP1723 | BR1919-2N <i>3HA-PCH2 nup2Δ::hphMX4</i>                                                                                          | This work |
| DP1724 | BR1919-2N <i>zip1Δ::LEU2 3HA-PCH2 nup2Δ::hphMX4</i>                                                                              | This work |
| DP1725 | DP421 <i>P<sub>HOP1</sub>-GFP-NES-PCH2/pch2Δ::TRP1 ndt80Δ::kanMX6</i>                                                            | This work |
| DP1726 | DP421 <i>zip1Δ::LYS2 P<sub>HOP1</sub>-GFP-NES-PCH2/pch2Δ::TRP1 ndt80Δ::kanMX6</i>                                                | This work |
| DP1729 | DP421 <i>P<sub>HOP1</sub>-GFP-NLS-PCH2/pch2Δ::TRP1 ndt80Δ::kanMX6</i>                                                            | This work |
| DP1730 | DP421 <i>zip1Δ::LYS2 P<sub>HOP1</sub>-GFP-NLS-PCH2/pch2Δ::TRP1 ndt80Δ::kanMX6</i>                                                | This work |
| DP1734 | DP421 <i>zip1Δ::LYS2 P<sub>HOP1</sub>-GFP-PCH2/pch2Δ::TRP1 dot1Δ::URA3</i>                                                       | This work |
| DP1744 | BR1919-2N <i>P<sub>HOP1</sub>-GFP-PCH2/pch2Δ::TRP1 nup2Δ::hphMX4</i>                                                             | This work |
| DP1745 | BR1919-2N <i>zip1Δ::LEU2 P<sub>HOP1</sub>-GFP-PCH2/pch2Δ::TRP1 nup2Δ::hphMX4</i>                                                 | This work |
| DP1746 | BR1919-2N <i>zip1Δ::LEU2 P<sub>HOP1</sub>-GFP-PCH2/pch2Δ::TRP1 orcl-3mAID::hphNT P<sub>HOP1</sub>-OsTIR1::URA3 dot1Δ::kanMX6</i> | This work |

|        |                                                                                                            |           |
|--------|------------------------------------------------------------------------------------------------------------|-----------|
| DP1747 | DP421 <i>zip1Δ::LYS2 P<sub>HOP1</sub>-GFP-NES-PCH2/pch2Δ::TRP1 dot1Δ::kanMX6</i>                           | This work |
| DP1768 | DP421 <i>P<sub>HOP1</sub>-GFP-NLS-PCH2 ndt80Δ::kanMX6</i>                                                  | This work |
| DP1769 | DP421 <i>zip1Δ::LYS2 P<sub>HOP1</sub>-GFP-NLS-PCH2 ndt80Δ::kanMX6</i>                                      | This work |
| DP1787 | DP421 <i>spo11-3HA-6His::kanMX4 pch2Δ::TRP1</i>                                                            | This work |
| DP1789 | DP421 <i>spo11-3HA-6His::kanMX4 P<sub>HOP1</sub>-GFP-PCH2/pch2Δ::TRP1</i>                                  | This work |
| DP1791 | DP421 <i>spo11-3HA-6His::kanMX4 P<sub>HOP1</sub>-GFP-NES-PCH2/pch2Δ::TRP1</i>                              | This work |
| DP1792 | DP421 <i>spo11-3HA-6His::kanMX4 P<sub>HOP1</sub>-GFP-NLS-PCH2</i>                                          | This work |
| DP1793 | DP421 <i>spo11-3HA-6His::kanMX4 P<sub>HOP1</sub>-GFP-NLS-PCH2/pch2Δ::TRP1</i>                              | This work |
| DP1795 | DP421 <i>PIL1-GBP-mCherry::hphMX6 P<sub>HOP1</sub>-GFP-NES-PCH2/pch2Δ::TRP1</i>                            | This work |
| DP1796 | DP421 <i>zip1Δ::LYS2 PIL1-GBP-mCherry::hphMX6 P<sub>HOP1</sub>-GFP-NES-PCH2/pch2Δ::TRP1</i>                | This work |
| DP1797 | BR1919-2N <i>PIL1-GBP-mCherry::hphMX6 P<sub>HOP1</sub>-GFP-PCH2/pch2Δ::TRP1 LYS2/lys2</i>                  | This work |
| DP1802 | DP421 <i>PIL1-GBP-mCherry::hphMX6 3HA-PCH2</i>                                                             | This work |
| DP1803 | DP421 <i>zip1Δ::LEU2 PIL1-GBP-mCherry::hphMX6 3HA-PCH2</i>                                                 | This work |
| DP1811 | DP421 <i>PIL1-GBP-mCherry::hphMX6 P<sub>HOP1</sub>-GFP-NES-PCH2/pch2Δ::TRP1 mek1Δ::natMX4</i>              | This work |
| DP1812 | DP421 <i>zip1Δ::LYS2 PIL1-GBP-mCherry::hphMX6 P<sub>HOP1</sub>-GFP-NES-PCH2/pch2Δ::TRP1 mek1Δ::natMX4</i>  | This work |
| DP1813 | BR1919-2N <i>PIL1-GBP-mCherry::hphMX6 P<sub>HOP1</sub>-GFP-PCH2/pch2Δ::TRP1 mek1Δ::natMX4 LYS2/lys2</i>    | This work |
| DP1846 | DP421 <i>PIL1-GBP-mCherry::hphMX6 P<sub>HOP1</sub>-GFP-NES-PCH2/pch2Δ::TRP1 spo11Δ::natMX4</i>             | This work |
| DP1847 | DP421 <i>zip1Δ::LYS2 PIL1-GBP-mCherry::hphMX6 P<sub>HOP1</sub>-GFP-NES-PCH2/pch2Δ::TRP1 spo11Δ::natMX4</i> | This work |

\*All strains are diploids isogenic to BR1919 and, unless specified, homozygous for the indicated markers. DP421 is a *lys2* version of the original BR1919-2N.
