# Supplementary material for: Pch2 orchestrates the meiotic recombination checkpoint from the cytoplasm
Source: PubMed Central journal article supplement (PMC8312941; doi:10.1371/journal.pgen.1009560), 2021-07-14
Supplement: pgen.1009560.s010.pdf [file pgen.1009560.s010.pdf]

**S2 Table. Plasmids**

| Plasmid name | Vector | Relevant parts                                  | Source/Reference       |
|--------------|--------|-------------------------------------------------|------------------------|
| pSS383       | pFA6a  | <i>GBP-mCherry::hphMX6</i>                      | A. Fernández-Álvarez   |
| pSS393       | pRS314 | <i>TRIP1 CEN6 P<sub>HOP1</sub>-GFP-PCH2</i>     | (Herruzo et al., 2019) |
| pSS408       | pRS314 | <i>TRIP1 CEN6 P<sub>HOP1</sub>.GFP-NES-PCH2</i> | This work              |
| pSS421       | pRS314 | <i>TRIP1 CEN6 P<sub>HOP1</sub>.GFP-NLS-PCH2</i> | This work              |
| pSK54        | pRS306 | <i>URA3 spo11-3HA-6His::kanMX4</i>              | (Kee and Keeney, 2002) |

Herruzo, E., B. Santos, R. Freire, J.A. Carballo, and P.A. San-Segundo. 2019. Characterization of Pch2 localization determinants reveals a nucleolar-independent role in the meiotic recombination checkpoint. *Chromosoma*. 128:297-316.

Kee, K., and S. Keeney. 2002. Functional interactions between SPO11 and REC102 during initiation of meiotic recombination in *Saccharomyces cerevisiae*. *Genetics*. 160:111-122.
