# Supplementary material for: Pch2 orchestrates the meiotic recombination checkpoint from the cytoplasm
Source: PubMed Central journal article supplement (PMC8312941; doi:10.1371/journal.pgen.1009560), 2021-07-14
Supplement: pgen.1009560.s011.pdf [file pgen.1009560.s011.pdf]

**S3 Table. Primary antibodies**

| Antibody      | Host and type     | Application*<br>(Dilution) | Source / Reference         |
|---------------|-------------------|----------------------------|----------------------------|
| Hop1 (5C12E8) | Mouse monoclonal  | WB (1:2000)                | (Herruzo et al., 2019)     |
| Hop1          | Rabbit polyclonal | IF (1:300)                 | (Smith and Roeder, 1997)   |
| Hop1-T318-ph  | Rabbit polyclonal | WB (1:1000)                | (Penedos et al., 2015)     |
| H3-T11-ph     | Rabbit polyclonal | WB (1:2000)                | Abcam<br>ab5168            |
| Pgk1 (22C5D8) | Mouse monoclonal  | WB (1:5000)                | Molecular Probes<br>459250 |
| Pch2          | Rabbit polyclonal | WB (1:2000)                | (Herruzo et al., 2019)     |
| Nsr1 (31C4)   | Mouse monoclonal  | IF (1:200)                 | ThermoFisher<br>MA1-10030  |
| mAID (1E4)    | Mouse monoclonal  | WB (1:400)                 | MBL<br>M214-3              |
| GFP (JL-8)    | Mouse monoclonal  | IF (1:200)                 | Clontech<br>632381         |

\*WB, western blot; IF, immunofluorescence

Herruzo, E., B. Santos, R. Freire, J.A. Carballo, and P.A. San-Segundo. 2019. Characterization of Pch2 localization determinants reveals a nucleolar-independent role in the meiotic recombination checkpoint. *Chromosoma*. 128:297-316.

Penedos, A., A.L. Johnson, E. Strong, A.S. Goldman, J.A. Carballo, and R.S. Cha. 2015. Essential and Checkpoint Functions of Budding Yeast ATM and ATR during Meiotic Prophase Are Facilitated by Differential Phosphorylation of a Meiotic Adaptor Protein, Hop1. *PLoS One*. 10:e0134297.

Smith, A.V., and G.S. Roeder. 1997. The yeast Red1 protein localizes to the cores of meiotic chromosomes. *J Cell Biol*. 136:957-967.
